# Supplementary material for: Successful treatment of diplopia using prism correction combined with vision therapy/orthoptics improves health-related quality of life
Source: PeerJ. 2024 May 9;12:e17315. doi: 10.7717/peerj.17315 (PMC11088820; doi:10.7717/peerj.17315)
Supplement: Supplemental Information 4 [file peerj-12-17315-s004.xls]

## Sheet: ENTER VALUES HERE
Instructions: Enter subject ID and responses for each item (1 subject per row): 0= Always 1= Often 2= Sometimes 3= Rarely 4= Never
Note: Items 14 & 19 not scored
Subject ID	Q1	Q2	Q3	Q4	Q5	Q6	Q7	Q8	Q9	Q10	Q11	Q12	Q13	Q14	Q15	Q16	Q17	Q18	Q19	Q20	Self-Perception (logit)	Interaction (logit)	Reading Function (logit)	General Function (logit)	Self-Perception (0 - 100)	Interaction (0 - 100)	Reading Function (0 - 100)	General Function (0 - 100)	COMMENTS	Q1	Q2	Q3	Q4	Q5	Q6	Q7	Q8	Q9	Q10	Q11	Q12	Q13	Q15	Q16	Q17	Q18	Q20
B1	4	4	4	4	4	4	4	4	4	4	1	3	3	0	0	0	4	0	2	1	4.686	3.56	-0.6325	-1.1425	100	100	46.8555	33.7117		4.77	4.41	4.44	4.17	2.65	5.64	3.26	3.96	3.81	4.12	-1.14	1.71	1.98	-3.1	-4.3	2.71	-3.04	-1.92
B2	4	4	4	4	4	4	4	4	4	4	3	4	4	2	2	3	3	1	4	2	4.686	3.56	2.9775	1.6375	100	100	84.3815	75.7851		4.77	4.41	4.44	4.17	2.65	5.64	3.26	3.96	3.81	4.12	3.16	3.59	3.86	1.41	3.44	2.71	-0.73	1.02
B3	4	4	4	4	4	4	4	4	4	4	4	3	3	4	3	4	4	0	4	4	4.686	3.56	3.54	1.585	100	100	90.2287	74.9905		4.77	4.41	4.44	4.17	2.65	5.64	3.26	3.96	3.81	4.12	3.16	1.71	1.98	3.51	5.32	2.71	-3.04	5.15
B4	2	3	2	3	4	3	4	2	3	3	2	2	2	2	2	2	2	2	2	1	1.68	2.112	-0.3825	1.1375	69.4884	79.4377	49.4543	68.2179		0.34	2.36	0.01	2.11	2.65	3.58	3.26	0.36	1.99	2.3	1.06	-0.53	-0.27	1.41	1.19	0.61	1.47	-1.92
B5	x	x	x	x	x	x	x	x	x	x	x	x	x	x	x	x	x	x	x	x	x	x	x	x	x	x	x	x	He used contact lens	FALSE	FALSE	FALSE	FALSE	FALSE	FALSE	FALSE	FALSE	FALSE	FALSE	FALSE	FALSE	FALSE	FALSE	FALSE	FALSE	FALSE	FALSE
B6	4	4	4	4	4	4	4	4	4	4	4	4	4	2	3	4	4	3	4	4	4.686	3.56	4.48	3.2375	100	100	100	100		4.77	4.41	4.44	4.17	2.65	5.64	3.26	3.96	3.81	4.12	3.16	3.59	3.86	3.51	5.32	2.71	3.57	5.15
B7	4	4	4	4	4	4	4	4	4	4	4	4	4	4	3	4	4	4	4	4	4.686	3.56	4.48	3.2375	100	100	100	100		4.77	4.41	4.44	4.17	2.65	5.64	3.26	3.96	3.81	4.12	3.16	3.59	3.86	3.51	5.32	2.71	3.57	5.15
I1	4	4	4	4	4	4	4	4	4	4	2	2	3	2	2	3	2	0	4	4	4.686	3.56	2.51	0.01	100	100	79.5218	51.154		4.77	4.41	4.44	4.17	2.65	5.64	3.26	3.96	3.81	4.12	1.06	-0.53	1.98	1.41	3.44	0.61	-3.04	5.15
B8	4	4	4	4	4	4	4	4	4	4	4	4	4	4	4	4	4	4	4	4	4.686	3.56	4.48	3.2375	100	100	100	100		4.77	4.41	4.44	4.17	2.65	5.64	3.26	3.96	3.81	4.12	3.16	3.59	3.86	3.51	5.32	2.71	3.57	5.15
B9	2	2	3	2	4	2	4	4	2	4	1	3	2	2	1	2	2	0	1	2	0.728	2.84	0.9125	-1.09	59.8254	89.7756	62.9158	34.5062		0.34	-0.02	2.39	-0.27	2.65	1.2	3.26	3.96	0.21	4.12	-1.14	1.71	-0.27	-0.79	1.19	0.61	-3.04	1.02
B10	4	4	4	4	4	4	4	4	4	4	4	4	4	4	4	4	4	4	4	4	4.686	3.56	4.48	3.2375	100	100	100	100		4.77	4.41	4.44	4.17	2.65	5.64	3.26	3.96	3.81	4.12	3.16	3.59	3.86	3.51	5.32	2.71	3.57	5.15
B11	3	3	4	3	0	4	4	2	3	4	2	2	2	2	0	2	2	0	2	2	3.454	1.068	0.3525	-1.1175	87.4949	64.6123	57.0946	34.09		2.72	2.36	4.44	2.11	-4.39	5.64	3.26	0.36	1.99	4.12	1.06	-0.53	-0.27	-3.1	1.19	0.61	-3.04	1.02
I2	4	4	4	4	4	4	4	4	4	4	4	4	0	1	1	0	4	0	1	0	4.686	3.56	-2.735	0.51	100	100	25	58.7212		4.77	4.41	4.44	4.17	2.65	5.64	3.26	3.96	3.81	4.12	3.16	3.59	-5.76	-0.79	-4.3	2.71	-3.04	-4.47
B12	4	4	4	4	4	4	4	4	4	4	3	3	3	1	2	3	2	1	2	2	4.686	3.56	2.0375	1.1125	100	100	74.6102	67.8396		4.77	4.41	4.44	4.17	2.65	5.64	3.26	3.96	3.81	4.12	3.16	1.71	1.98	1.41	3.44	0.61	-0.73	1.02
B13	4	4	4	4	4	4	4	4	4	4	4	4	4	2	2	3	3	0	1	3	4.686	3.56	3.54	1.06	100	100	90.2287	67.045		4.77	4.41	4.44	4.17	2.65	5.64	3.26	3.96	3.81	4.12	3.16	3.59	3.86	1.41	3.44	2.71	-3.04	3.27
I3	4	4	4	4	4	4	4	4	4	4	4	4	4	4	4	4	4	2	4	4	4.686	3.56	4.48	2.7125	100	100	100	92.0545		4.77	4.41	4.44	4.17	2.65	5.64	3.26	3.96	3.81	4.12	3.16	3.59	3.86	3.51	5.32	2.71	1.47	5.15
I4	3	4	2	3	4	3	3	2	4	4	0	2	2	0	2	1	2	0	0	3	2.566	2.478	0.18	-1.1175	78.4815	84.635	55.3015	34.09		2.72	4.41	0.01	2.11	2.65	3.58	1.45	0.36	3.81	4.12	-3.45	-0.53	-0.27	1.41	-1.75	0.61	-3.04	3.27
B14	2	2	2	2	3	2	2	2	2	2	2	2	1	1	2	2	3	1	2	2	0.252	0.316	-0.3825	1.1125	54.9939	53.9335	49.4543	67.8396		0.34	-0.02	0.01	-0.27	0.83	1.2	-0.34	0.36	0.21	0.52	1.06	-0.53	-3.21	1.41	1.19	2.71	-0.73	1.02
B15	x	x	x	x	x	x	x	x	x	x	x	x	x	x	x	x	x	x	x	x	x	x	x	x	x	x	x	x	He died	FALSE	FALSE	FALSE	FALSE	FALSE	FALSE	FALSE	FALSE	FALSE	FALSE	FALSE	FALSE	FALSE	FALSE	FALSE	FALSE	FALSE	FALSE
B16	4	4	4	4	4	4	4	4	4	4	4	4	4	4	4	4	4	4	4	4	4.69	3.56	4.48	3.2375	100	100	100	100		4.77	4.41	4.44	4.17	2.65	5.64	3.26	3.96	3.81	4.12	3.16	3.59	3.86	3.51	5.32	2.71	3.57	5.15
I5	4	4	4	4	4	2	4	2	2	2	4	0	1	0	4	0	1	0	0	0	3.798	1.4	-4.5025	0.5125	90.9866	69.3269	6.62682	58.759		4.77	4.41	4.44	4.17	2.65	1.2	3.26	0.36	0.21	0.52	3.16	-6.03	-3.21	3.51	-4.3	-1.58	-3.04	-4.47
B17	3	3	3	4	4	3	4	4	4	4	1	1	1	1	2	0	2	0	2	0	3.044	3.56	-3.8625	-0.54	83.3333	100	13.2796	42.8301		2.72	2.36	2.39	4.17	2.65	3.58	3.26	3.96	3.81	4.12	-1.14	-3.47	-3.21	1.41	-4.3	0.61	-3.04	-4.47
B18	2	1	0	0	3	2	3	3	2	3	0	3	2	1	1	0	2	1	1	0	-2.49	1.388	-1.8325	-1.09	27.162	69.1565	34.3815	34.5062		0.34	-2.9	-5.41	-5.68	0.83	1.2	1.45	2.15	0.21	2.3	-3.45	1.71	-0.27	-0.79	-4.3	0.61	-0.73	-4.47
B19	4	4	4	4	4	4	4	4	4	4	4	4	4	4	0	4	4	4	4	4	4.686	3.56	4.48	1.585	100	100	100	74.9905		4.77	4.41	4.44	4.17	2.65	5.64	3.26	3.96	3.81	4.12	3.16	3.59	3.86	-3.1	5.32	2.71	3.57	5.15
B20	4	2	3	3	3	4	3	2	3	3	1	1	2	1	2	0	1	1	2	1	2.978	1.386	-2.49	-0.51	82.6634	69.1281	27.5468	43.2841		4.77	-0.02	2.39	2.11	0.83	5.64	1.45	0.36	1.99	2.3	-1.14	-3.47	-0.27	1.41	-4.3	-1.58	-0.73	-1.92
B21	4	4	4	4	4	4	4	4	4	4	4	4	4	4	4	4	4	4	4	4	4.686	3.56	4.48	3.2375	100	100	100	100		4.77	4.41	4.44	4.17	2.65	5.64	3.26	3.96	3.81	4.12	3.16	3.59	3.86	3.51	5.32	2.71	3.57	5.15
I6	4	4	4	4	4	4	4	4	4	4	4	4	4	3	4	4	4	3	4	4	4.686	3.56	4.48	3.2375	100	100	100	100		4.77	4.41	4.44	4.17	2.65	5.64	3.26	3.96	3.81	4.12	3.16	3.59	3.86	3.51	5.32	2.71	3.57	5.15
I7	x	x	x	x	x	x	x	x	x	x	x	x	x	x	x	x	x	x	x	x	x	x	x	x	x	x	x	x	He dropped out the treatment	FALSE	FALSE	FALSE	FALSE	FALSE	FALSE	FALSE	FALSE	FALSE	FALSE	FALSE	FALSE	FALSE	FALSE	FALSE	FALSE	FALSE	FALSE
B22	4	4	4	4	4	4	4	4	4	4	4	4	4	4	4	4	4	2	4	4	4.686	3.56	4.48	2.7125	100	100	100	92.0545		4.77	4.41	4.44	4.17	2.65	5.64	3.26	3.96	3.81	4.12	3.16	3.59	3.86	3.51	5.32	2.71	1.47	5.15
I8	2	3	3	3	3	3	3	4	3	4	4	3	2	4	3	3	3	1	2	3	2.156	2.47	2.0375	2.1625	74.3199	84.5214	74.6102	83.7306		0.34	2.36	2.39	2.11	0.83	3.58	1.45	3.96	1.99	4.12	3.16	1.71	-0.27	3.51	3.44	2.71	-0.73	3.27
I9	3	4	4	4	4	4	4	4	4	4	2	2	2	2	1	2	2	1	2	2	4.276	3.56	0.3525	0.0375	95.8384	100	57.0946	51.5702		2.72	4.41	4.44	4.17	2.65	5.64	3.26	3.96	3.81	4.12	1.06	-0.53	-0.27	-0.79	1.19	0.61	-0.73	1.02
B23	x	x	x	x	x	x	x	x	x	x	x	x	x	x	x	x	x	x	x	x	x	x	x	x	x	x	x	x	She dropped out the treatment	#REF!	#REF!	#REF!	#REF!	#REF!	#REF!	#REF!	#REF!	#REF!	#REF!	#REF!	#REF!	#REF!	#REF!	#REF!	#REF!	#REF!	#REF!
B24	2	2	2	2	2	2	2	2	2	3	2	2	2	0	1	2	2	0	2	2	0.252	0.316	0.3525	-0.54	54.9939	53.9335	57.0946	42.8301		0.34	-0.02	0.01	-0.27	-0.95	1.2	-0.34	0.36	0.21	2.3	1.06	-0.53	-0.27	-0.79	1.19	0.61	-3.04	1.02
I10	4	4	4	4	4	4	4	4	4	4	4	4	4	4	4	4	4	4	4	4	4.686	3.56	4.48	3.2375	100	100	100	100		4.77	4.41	4.44	4.17	2.65	5.64	3.26	3.96	3.81	4.12	3.16	3.59	3.86	3.51	5.32	2.71	3.57	5.15
I11	4	4	4	4	4	4	4	4	4	4	4	4	3	4	2	3	4	3	4	2	4.686	3.56	2.5075	2.7125	100	100	79.4958	92.0545		4.77	4.41	4.44	4.17	2.65	5.64	3.26	3.96	3.81	4.12	3.16	3.59	1.98	1.41	3.44	2.71	3.57	1.02
B25	4	4	4	4	4	4	4	4	4	3	4	4	4	4	4	4	4	0	4	4	4.686	3.196	4.48	1.585	100	94.831	100	74.9905		4.77	4.41	4.44	4.17	2.65	5.64	3.26	3.96	3.81	2.3	3.16	3.59	3.86	3.51	5.32	2.71	-3.04	5.15
B26	2	3	2	1	3	2	2	3	3	3	2	3	3	3	2	2	1	0	2	2	0.154	1.386	1.475	-0.5375	53.9992	69.1281	68.763	42.868		0.34	2.36	0.01	-3.14	0.83	1.2	-0.34	2.15	1.99	2.3	1.06	1.71	1.98	1.41	1.19	-1.58	-3.04	1.02
B27	x	x	x	x	x	x	x	x	x	x	x	x	x	x	x	x	x	x	x	x	x	x	x	x	x	x	x	x	He dropped out the treatment	FALSE	FALSE	FALSE	FALSE	FALSE	FALSE	FALSE	FALSE	FALSE	FALSE	FALSE	FALSE	FALSE	FALSE	FALSE	FALSE	FALSE	FALSE
I12	4	4	4	4	4	4	4	4	4	4	4	1	0	3	2	0	4	2	2	0	4.686	3.56	-4.5	2.1875	100	100	6.65281	84.109		4.77	4.41	4.44	4.17	2.65	5.64	3.26	3.96	3.81	4.12	3.16	-3.47	-5.76	1.41	-4.3	2.71	1.47	-4.47
B28	4	4	4	4	4	2	4	4	4	2	2	1	2	2	2	1	4	0	0	1	3.798	2.84	-1.8525	0.535	90.9866	89.7756	34.1736	59.0995		4.77	4.41	4.44	4.17	2.65	1.2	3.26	3.96	3.81	0.52	1.06	-3.47	-0.27	1.41	-1.75	2.71	-3.04	-1.92
B29	4	4	4	4	4	4	4	4	4	4	1	0	0	0	2	1	2	1	1	1	4.686	3.56	-3.865	0.0375	100	100	13.2536	51.5702		4.77	4.41	4.44	4.17	2.65	5.64	3.26	3.96	3.81	4.12	-1.14	-6.03	-5.76	1.41	-1.75	0.61	-0.73	-1.92
B30	4	4	4	4	4	4	4	4	4	4	4	4	4	4	4	4	4	4	4	4	4.686	3.56	4.48	3.2375	100	100	100	100		4.77	4.41	4.44	4.17	2.65	5.64	3.26	3.96	3.81	4.12	3.16	3.59	3.86	3.51	5.32	2.71	3.57	5.15
B31	3	4	3	4	3	4	4	4	4	4	2	4	4	2	3	4	2	2	3	4	3.866	3.196	4.48	1.6625	91.6768	94.831	100	76.1635		2.72	4.41	2.39	4.17	0.83	5.64	3.26	3.96	3.81	4.12	1.06	3.59	3.86	3.51	5.32	0.61	1.47	5.15
I13	4	4	4	4	4	4	4	4	4	4	4	4	3	4	2	4	4	0	4	4	4.686	3.56	4.01	1.06	100	100	95.1143	67.045		4.77	4.41	4.44	4.17	2.65	5.64	3.26	3.96	3.81	4.12	3.16	3.59	1.98	1.41	5.32	2.71	-3.04	5.15
B32	4	4	4	4	4	4	4	4	4	4	2	4	4	2	4	2	4	2	4	4	4.686	3.56	3.4475	2.1875	100	100	89.2672	84.109		4.77	4.41	4.44	4.17	2.65	5.64	3.26	3.96	3.81	4.12	1.06	3.59	3.86	3.51	1.19	2.71	1.47	5.15
B34	1	1	0	0	3	0	2	1	2	1	0	0	0	0	0	0	1	1	1	0	-4.15	-0.368	-5.14	-2.215	10.3126	44.2204	0	17.4801		-2.54	-2.9	-5.41	-5.68	0.83	-4.22	-0.34	-1.35	0.21	-1.19	-3.45	-6.03	-5.76	-3.1	-4.3	-1.58	-0.73	-4.47
B33	4	4	4	4	4	4	4	4	4	4	2	2	2	3	1	1	1	1	2	0	4.686	3.56	-1.755	-0.51	100	100	35.1871	43.2841		4.77	4.41	4.44	4.17	2.65	5.64	3.26	3.96	3.81	4.12	1.06	-0.53	-0.27	-0.79	-1.75	-1.58	-0.73	-4.47
I14	4	4	4	4	4	4	4	4	4	4	4	4	3	4	2	4	4	0	4	4	4.686	3.56	4.01	1.06	100	100	95.1143	67.045		4.77	4.41	4.44	4.17	2.65	5.64	3.26	3.96	3.81	4.12	3.16	3.59	1.98	1.41	5.32	2.71	-3.04	5.15

## Sheet: RaschConv
Rasch Lookup Values
Derived from Winsteps Item-Structure File (ISFILE=)
(BOT+.25, AT CAT, and TOP-.25)
Self-Perception Subscale
Response Category	Response Value	Q1	Q2	Q3	Q4	Q6
Always	0	-5.08	-5.44	-5.41	-5.68	-4.22
Often	1	-2.54	-2.9	-2.87	-3.14	-1.67
Sometimes	2	0.34	-0.02	0.01	-0.27	1.2
Rarely	3	2.72	2.36	2.39	2.11	3.58
Never	4	4.77	4.41	4.44	4.17	5.64
Interaction Subscale
Response Category	Response Value	Q5	Q7	Q8	Q9	Q10
Always	0	-4.39	-3.78	-3.08	-3.23	-2.93
Often	1	-2.66	-2.05	-1.35	-1.5	-1.19
Sometimes	2	-0.95	-0.34	0.36	0.21	0.52
Rarely	3	0.83	1.45	2.15	1.99	2.3
Never	4	2.65	3.26	3.96	3.81	4.12
Reading Function Subscale
Response Category	Response Value	Q12	Q13	Q16	Q20
Always	0	-6.03	-5.76	-4.3	-4.47
Often	1	-3.47	-3.21	-1.75	-1.92
Sometimes	2	-0.53	-0.27	1.19	1.02
Rarely	3	1.71	1.98	3.44	3.27
Never	4	3.59	3.86	5.32	5.15
General Function Subscale
Response Category	Response Value	Q11	Q15	Q17	Q18
Always	0	-3.45	-3.1	-3.89	-3.04
Often	1	-1.14	-0.79	-1.58	-0.73
Sometimes	2	1.06	1.41	0.61	1.47
Rarely	3	3.16	3.51	2.71	3.57
Never	4	3.16	3.51	2.71	3.57
