# Supplementary material for: Successful treatment of diplopia using prism correction combined with vision therapy/orthoptics improves health-related quality of life
Source: PeerJ. 2024 May 9;12:e17315. doi: 10.7717/peerj.17315 (PMC11088820; doi:10.7717/peerj.17315)
Supplement: Supplemental Information 5 [file peerj-12-17315-s005.xls]

## Sheet: ENTER VALUES HERE
Instructions: Enter subject ID and responses for each item (1 subject per row): 0= Always 1= Often 2= Sometimes 3= Rarely 4= Never
Note: Items 14 & 19 not scored
Subject ID	Q1	Q2	Q3	Q4	Q5	Q6	Q7	Q8	Q9	Q10	Q11	Q12	Q13	Q14	Q15	Q16	Q17	Q18	Q19	Q20	Self-Perception (logit)	Interaction (logit)	Reading Function (logit)	General Function (logit)	Self-Perception (0 - 100)	Interaction (0 - 100)	Reading Function (0 - 100)	General Function (0 - 100)	COMMENTS	Q1	Q2	Q3	Q4	Q5	Q6	Q7	Q8	Q9	Q10	Q11	Q12	Q13	Q15	Q16	Q17	Q18	Q20
B1	4	4	4	4	4	4	4	4	4	4	2	4	4	1	2	3	4	0	4	3	4.686	3.56	3.54	0.535	100	100	90.2287	59.0995		4.77	4.41	4.44	4.17	2.65	5.64	3.26	3.96	3.81	4.12	1.06	3.59	3.86	1.41	3.44	2.71	-3.04	3.27
B2	4	3	4	4	4	4	4	4	4	4	3	4	3	2	3	3	4	3	4	3	4.276	3.56	3.07	3.2375	95.8384	100	85.343	100		4.77	2.36	4.44	4.17	2.65	5.64	3.26	3.96	3.81	4.12	3.16	3.59	1.98	3.51	3.44	2.71	3.57	3.27
B5	2	3	3	2	4	4	3	3	2	2	2	2	2	3	2	2	2	0	3	3	2.092	1.396	0.915	0.01	73.6703	69.2701	62.9418	51.154		0.34	2.36	2.39	-0.27	2.65	5.64	1.45	2.15	0.21	0.52	1.06	-0.53	-0.27	1.41	1.19	0.61	-3.04	3.27
B6	4	4	4	4	4	4	4	4	4	4	4	4	4	2	3	4	4	3	4	4	4.686	3.56	4.48	3.2375	100	100	100	100		4.77	4.41	4.44	4.17	2.65	5.64	3.26	3.96	3.81	4.12	3.16	3.59	3.86	3.51	5.32	2.71	3.57	5.15
B9	2	4	4	4	4	4	4	4	4	4	2	4	4	3	4	4	2	1	4	4	3.8	3.56	4.48	1.1125	91.0069	100	100	67.8396		0.34	4.41	4.44	4.17	2.65	5.64	3.26	3.96	3.81	4.12	1.06	3.59	3.86	3.51	5.32	0.61	-0.73	5.15
B11	4	4	2	4	0	4	4	4	4	4	2	4	2	2	1	4	2	0	2	2	3.8	2.152	2.415	-0.54	91.0069	80.0057	78.5343	42.8301		4.77	4.41	0.01	4.17	-4.39	5.64	3.26	3.96	3.81	4.12	1.06	3.59	-0.27	-0.79	5.32	0.61	-3.04	1.02
I2	4	4	4	4	4	4	4	4	4	4	4	4	3	3	4	4	2	2	3	3	4.686	3.56	3.54	2.1875	100	100	90.2287	84.109		4.77	4.41	4.44	4.17	2.65	5.64	3.26	3.96	3.81	4.12	3.16	3.59	1.98	3.51	5.32	0.61	1.47	3.27
B13	4	4	4	4	4	4	4	4	4	4	2	2	2	4	1	2	3	0	1	1	4.686	3.56	-0.3825	-0.015	100	100	49.4543	50.7756		4.77	4.41	4.44	4.17	2.65	5.64	3.26	3.96	3.81	4.12	1.06	-0.53	-0.27	-0.79	1.19	2.71	-3.04	-1.92
I4	4	4	4	4	4	4	4	4	4	4	3	4	4	2	4	4	4	3	4	4	4.686	3.56	4.48	3.2375	100	100	100	100		4.77	4.41	4.44	4.17	2.65	5.64	3.26	3.96	3.81	4.12	3.16	3.59	3.86	3.51	5.32	2.71	3.57	5.15
I5	X	X	X	X	X	X	X	X	X	X	X	X	X	X	X	X	X	X	X	X	X	X	X	X	X	X	X	X	She dropped out the treatment	FALSE	FALSE	FALSE	FALSE	FALSE	FALSE	FALSE	FALSE	FALSE	FALSE	FALSE	FALSE	FALSE	FALSE	FALSE	FALSE	FALSE	FALSE
B14	2	2	2	2	3	3	2	3	4	3	3	2	3	2	2	2	2	1	2	3	0.728	1.75	1.4775	1.1125	59.8254	74.2971	68.789	67.8396		0.34	-0.02	0.01	-0.27	0.83	3.58	-0.34	2.15	3.81	2.3	3.16	-0.53	1.98	1.41	1.19	0.61	-0.73	3.27
B18	2	4	3	2	2	3	2	3	3	4	4	3	2	1	2	3	2	0	2	2	2.09	1.394	1.475	0.535	73.65	69.2417	68.763	59.0995		0.34	4.41	2.39	-0.27	-0.95	3.58	-0.34	2.15	1.99	4.12	3.16	1.71	-0.27	1.41	3.44	0.61	-3.04	1.02
B20	4	3	4	4	3	4	4	3	3	4	3	4	3	3	2	2	3	2	2	3	4.276	2.47	2.5075	2.1875	95.8384	84.5214	79.4958	84.109		4.77	2.36	4.44	4.17	0.83	5.64	3.26	2.15	1.99	4.12	3.16	3.59	1.98	1.41	1.19	2.71	1.47	3.27
B26	2	3	2	1	3	2	2	3	3	3	2	3	3	3	2	2	2	0	2	2	0.154	1.386	1.475	0.01	53.9992	69.1281	68.763	51.154		0.34	2.36	0.01	-3.14	0.83	1.2	-0.34	2.15	1.99	2.3	1.06	1.71	1.98	1.41	1.19	0.61	-3.04	1.02
B28	4	4	4	4	4	4	4	4	4	2	2	0	2	2	1	2	2	0	1	1	4.686	2.84	-1.7575	-0.54	100	89.7756	35.1611	42.8301		4.77	4.41	4.44	4.17	2.65	5.64	3.26	3.96	3.81	0.52	1.06	-6.03	-0.27	-0.79	1.19	0.61	-3.04	-1.92
B29	4	4	4	4	4	4	4	4	4	4	1	0	0	2	1	1	1	1	1	1	4.686	3.56	-3.865	-1.06	100	100	13.2536	34.9603		4.77	4.41	4.44	4.17	2.65	5.64	3.26	3.96	3.81	4.12	-1.14	-6.03	-5.76	-0.79	-1.75	-1.58	-0.73	-1.92
B31	2	2	3	3	4	4	4	4	4	4	2	4	4	3	2	4	2	2	3	3	2.092	3.56	4.01	1.1375	73.6703	100	95.1143	68.2179		0.34	-0.02	2.39	2.11	2.65	5.64	3.26	3.96	3.81	4.12	1.06	3.59	3.86	1.41	5.32	0.61	1.47	3.27
B32	4	4	4	4	4	4	4	4	4	4	4	4	4	4	4	4	4	4	4	4	4.75	3.56	4.48	3.2375	52.4361	100	100	100
B33	2	3	2	2	4	2	3	4	4	4	2	1	2	3	1	2	1	1	3	2	0.728	3.198	-0.3825	-0.51	59.8254	94.8594	49.4543	43.2841		0.34	2.36	0.01	-0.27	2.65	1.2	1.45	3.96	3.81	4.12	1.06	-3.47	-0.27	-0.79	1.19	-1.58	-0.73	1.02
B34	1	2	0	2	1	1	2	0	2	1	1	0	2	1	1	0	1	1	1	0	-1.03	-1.412	-3.7675	-1.06	41.9813	29.3951	14.2672	34.9603		-2.54	-0.02	-5.41	-0.27	-2.66	-1.67	-0.34	-3.08	0.21	-1.19	-1.14	-6.03	-0.27	-0.79	-4.3	-1.58	-0.73	-4.47
I9	4	4	4	4	4	4	4	4	4	4	4	4	4	4	2	4	2	2	4	4	4.686	3.56	4.48	1.6625	100	100	100	76.1635		4.77	4.41	4.44	4.17	2.65	5.64	3.26	3.96	3.81	4.12	3.16	3.59	3.86	1.41	5.32	0.61	1.47	5.15
B17	4	4	4	4	4	4	4	4	4	4	2	4	4	4	4	4	4	4	4	4	4.686	3.56	4.48	2.7125	100	100	100	92.0545		4.77	4.41	4.44	4.17	2.65	5.64	3.26	3.96	3.81	4.12	1.06	3.59	3.86	3.51	5.32	2.71	3.57	5.15
	4	4																												4.77	4.41
																														#REF!	#REF!	#REF!	#REF!	#REF!	#REF!	#REF!	#REF!	#REF!	#REF!	#REF!	#REF!	#REF!	#REF!	#REF!	#REF!	#REF!	#REF!

## Sheet: RaschConv
Rasch Lookup Values
Derived from Winsteps Item-Structure File (ISFILE=)
(BOT+.25, AT CAT, and TOP-.25)
Self-Perception Subscale
Response Category	Response Value	Q1	Q2	Q3	Q4	Q6
Always	0	-5.08	-5.44	-5.41	-5.68	-4.22
Often	1	-2.54	-2.9	-2.87	-3.14	-1.67
Sometimes	2	0.34	-0.02	0.01	-0.27	1.2
Rarely	3	2.72	2.36	2.39	2.11	3.58
Never	4	4.77	4.41	4.44	4.17	5.64
Interaction Subscale
Response Category	Response Value	Q5	Q7	Q8	Q9	Q10
Always	0	-4.39	-3.78	-3.08	-3.23	-2.93
Often	1	-2.66	-2.05	-1.35	-1.5	-1.19
Sometimes	2	-0.95	-0.34	0.36	0.21	0.52
Rarely	3	0.83	1.45	2.15	1.99	2.3
Never	4	2.65	3.26	3.96	3.81	4.12
Reading Function Subscale
Response Category	Response Value	Q12	Q13	Q16	Q20
Always	0	-6.03	-5.76	-4.3	-4.47
Often	1	-3.47	-3.21	-1.75	-1.92
Sometimes	2	-0.53	-0.27	1.19	1.02
Rarely	3	1.71	1.98	3.44	3.27
Never	4	3.59	3.86	5.32	5.15
General Function Subscale
Response Category	Response Value	Q11	Q15	Q17	Q18
Always	0	-3.45	-3.1	-3.89	-3.04
Often	1	-1.14	-0.79	-1.58	-0.73
Sometimes	2	1.06	1.41	0.61	1.47
Rarely	3	3.16	3.51	2.71	3.57
Never	4	3.16	3.51	2.71	3.57
